# Supplementary material
Source: PubMed Central journal article supplement (PMC3360509)
Supplement: Supp_Data.pdf [file Supp_Data.pdf]

## Supplementary Data

SUPPLEMENTARY TABLE S1. FOLLICLE NUMBER AND SURVIVAL VERSUS CULTURE TIME

| <i>Follicle size (<math>\mu\text{m}</math>)</i> | <i>MEFs (cells/well)</i> | <i>Day 0, n</i> | <i>Day 4, n (%)</i> | <i>Day 8, n (%)</i> | <i>Day 10, n (%)</i> |
|-------------------------------------------------|--------------------------|-----------------|---------------------|---------------------|----------------------|
| 100                                             | $1.0 \times 10^4$        | 11              | 11 (100)            | 11 (100)            | 11 (100)             |
|                                                 | $2.0 \times 10^4$        | 13              | 13 (100)            | 13 (100)            | 13 (100)             |
|                                                 | $3.0 \times 10^4$        | 8               | 7 (88)              | 6 (75)              | 5 (63)               |
|                                                 | $4.0 \times 10^4$        | 5               | 5 (100)             | 5 (100)             | 5 (100)              |
| 90                                              | $1.0 \times 10^4$        | 12              | 10 (83)             | 10 (83)             | 7 (58)               |
|                                                 | $2.0 \times 10^4$        | 28              | 25 (89)             | 24 (86)             | 21 (75)              |
|                                                 | $3.0 \times 10^4$        | 5               | 4 (80)              | 4 (80)              | 4 (80)               |
|                                                 | $4.0 \times 10^4$        | 6               | 6 (100)             | 6 (100)             | 6 (100)              |
| 80                                              | $1.0 \times 10^4$        | 7               | 7 (100)             | 6 (86)              | 3 (43)               |
|                                                 | $2.0 \times 10^4$        | 10              | 9 (90)              | 8 (80)              | 6 (60)               |
|                                                 | $3.0 \times 10^4$        | 7               | 7 (100)             | 6 (86)              | 5 (71)               |
|                                                 | $4.0 \times 10^4$        | 9               | 7 (78)              | 7 (78)              | 6 (67)               |

MEF, mouse embryonic fibroblast.

SUPPLEMENTARY TABLE S2. GROWTH OF SURVIVING FOLLICLES VERSUS CULTURE TIME

| <i>Follicle size (<math>\mu\text{m}</math>)</i> | <i>MEFs (cells/well)</i> | <i>Day 0 (<math>\mu\text{m}</math>)</i> | <i>Day 4 (<math>\mu\text{m}</math>)</i> | <i>Day 8 (<math>\mu\text{m}</math>)</i> | <i>Day 10 (<math>\mu\text{m}</math>)</i> |
|-------------------------------------------------|--------------------------|-----------------------------------------|-----------------------------------------|-----------------------------------------|------------------------------------------|
| 100                                             | $1.0 \times 10^4$        | $100 \pm 3$                             | $136 \pm 22$                            | $215 \pm 65$                            | $268 \pm 72$                             |
|                                                 | $2.0 \times 10^4$        | $101 \pm 3$                             | $152 \pm 22$                            | $270 \pm 74$                            | $316 \pm 64$                             |
|                                                 | $3.0 \times 10^4$        | $100 \pm 2$                             | $145 \pm 10$                            | $221 \pm 53$                            | $293 \pm 70$                             |
|                                                 | $4.0 \times 10^4$        | $100 \pm 2$                             | $157 \pm 13$                            | $284 \pm 53$                            | $345 \pm 53$                             |
| 90                                              | $1.0 \times 10^4$        | $91 \pm 3$                              | $127 \pm 12$                            | $188 \pm 63$                            | $231 \pm 97$                             |
|                                                 | $2.0 \times 10^4$        | $91 \pm 3$                              | $127 \pm 9$                             | $171 \pm 40$                            | $221 \pm 61$                             |
|                                                 | $3.0 \times 10^4$        | $90 \pm 3$                              | $135 \pm 6$                             | $209 \pm 34$                            | $282 \pm 49$                             |
|                                                 | $4.0 \times 10^4$        | $91 \pm 2$                              | $137 \pm 15$                            | $186 \pm 49$                            | $237 \pm 52$                             |
| 80                                              | $1.0 \times 10^4$        | $81 \pm 3$                              | $109 \pm 9$                             | $137 \pm 16$                            | $181 \pm 30$                             |
|                                                 | $2.0 \times 10^4$        | $79 \pm 5$                              | $119 \pm 9$                             | $138 \pm 13$                            | $175 \pm 33$                             |
|                                                 | $3.0 \times 10^4$        | $80 \pm 4$                              | $122 \pm 14$                            | $162 \pm 30$                            | $192 \pm 45$                             |
|                                                 | $4.0 \times 10^4$        | $79 \pm 4$                              | $110 \pm 10$                            | $133 \pm 13$                            | $165 \pm 15$                             |

Diameter presented as mean  $\pm$  standard deviation.

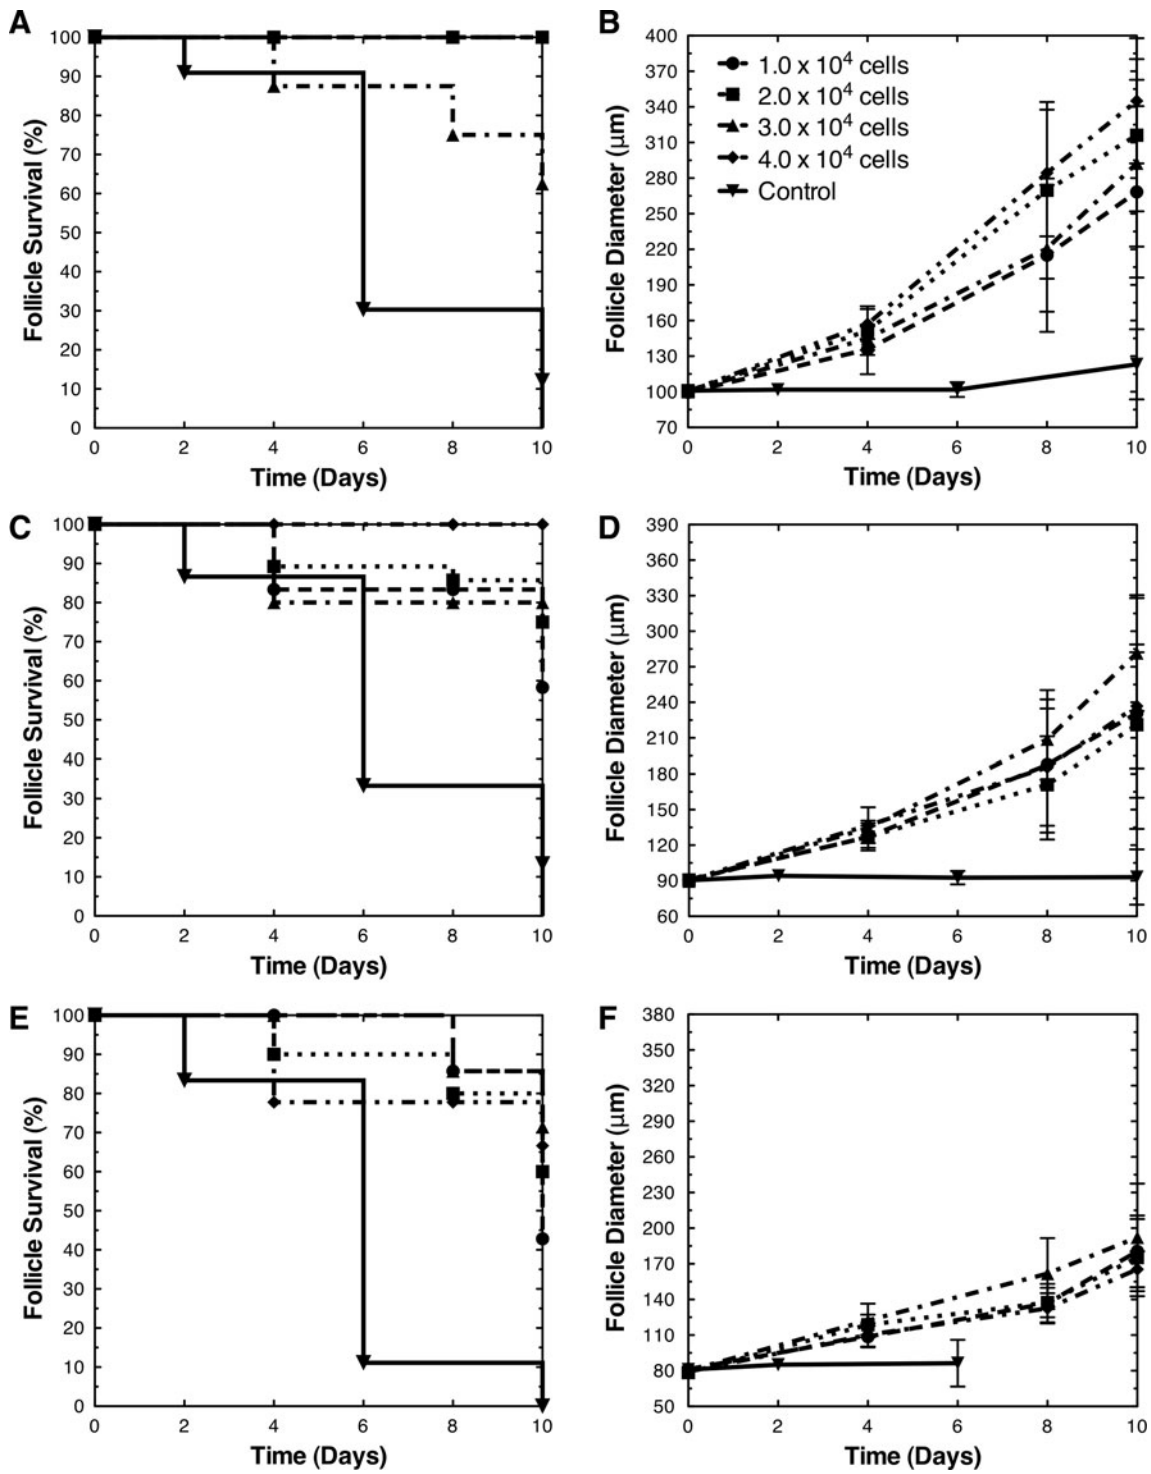

**SUPPLEMENTARY FIG. S1.** Follicle survival and growth vs. mouse embryonic fibroblast (MEF) concentration. Follicle survival and growth (diameter mean ± standard deviation) as a function of MEF seeding concentration ( $1.0\text{--}4.0 \times 10^4$  cells/well): (A, B)  $100\ \mu\text{m}$ , (C, D)  $90\ \mu\text{m}$ , and (E, F)  $80\ \mu\text{m}$ . No statistical differences or trend in follicle survival and growth were observed; all concentrations were equally effective at enhancing the survival and growth of all follicles sizes.
